# 1 Y recombination arrest and degeneration in the absence of 2 sexual dimorphism

3 **Authors: Thomas Lenormand<sup>1\*</sup>, Denis Roze<sup>2,3</sup>**

## 4 **Affiliations:**

5 <sup>1</sup> CEFE, Univ Montpellier, CNRS, Univ Paul Valéry Montpellier 3, EPHE, IRD, Montpellier,  
6 France.

7 <sup>2</sup> CNRS, IRL 3614, Roscoff, France.

8 <sup>3</sup> Sorbonne Université, Station Biologique de Roscoff, France.

9 \*Correspondence to: [thomas.lenormand@cefe.cnrs.fr](mailto:thomas.lenormand@cefe.cnrs.fr)

10

## 11 **Abstract:**

12

13 Current theory proposes degenerated sex chromosomes evolve via three successive steps:  
14 recombination arrest, which links male-beneficial alleles to the Y chromosome; degeneration of  
15 these regions due to the inefficacy of natural selection in the absence of recombination; and lastly,  
16 the evolution of dosage compensation to correct the resulting low expression of X-linked genes in  
17 males. Here we investigate new models of sex chromosome evolution incorporating the  
18 coevolution of cis- and trans-regulators of gene expression. We show that the early emergence of  
19 dosage compensation favors the maintenance of Y-linked inversions by creating sex-antagonistic  
20 regulatory effects. This is followed by inversion degeneration caused by regulatory divergence  
21 between the X and Y chromosomes. In stark contrast to the current theory, the whole process  
22 occurs without any selective pressure related to sexual dimorphism.

23

## 24 **One Sentence Summary:**

25 Turning sex chromosome theory on its head: early evolution of dosage compensation can  
26 maintain successively forming Y chromosome strata that undergo genetic degeneration.

27

## 28 **Main Text:**

29 Many species have XX/XY chromosomal sex determination systems (1). Y chromosomes are often  
30 non-recombining and degenerated. Suppressed genetic recombination initiates genetic  
31 degeneration, and Y chromosome evolution of an autosomal ancestor. In several chiasmate  
32 species, recombination suppression has been shown to involve successive events, each affecting  
33 Y sub-regions of different sizes, called “strata”, that are detected from differences in sequence  
34 divergence from the homologous X regions (2–5). Current theory proposes that Y chromosomes  
35 evolve through three steps. Step 1 is a consequence of the evolution of sexual dimorphism (9):  
36 divergent selection in males and females may generate intralocus sexual conflict, which, for loci  
37 linked to a sex-determining locus, favours suppressed recombination, so that the allele favorable  
38 in one sex becomes associated with that sex (6–13). In the second step, selective interference in

39 the absence of recombination reduces the efficacy of natural selection, leading to accumulation of  
40 deleterious mutations on the Y and genetic degeneration. Finally, the model proposes a third step  
41 in which dosage compensation evolves to restore optimal gene expression in males, whose sex-  
42 linked genes have lowered expression due to degeneration (7, 14–16). The compensation process  
43 involve various mechanisms in different species, and compensation is not always complete for all  
44 X linked genes (17–20). The steps in this theory have been studied over the past c.a. 50 years, both  
45 empirically and theoretically (5, 6, 21–25). Empirical support for the first step is particularly  
46 equivocal where despite decades of investigation (3, 5, 26, 27), decisive evidence for a causal role  
47 of sexually-antagonistic loci on recombination arrest, is conspicuously lacking. The second step is  
48 difficult to reconcile with the observation of small degenerated strata (5), within which selective  
49 interference should be minimal. Lastly, the causal ordering of events has also been challenged by  
50 observation of the early evolution of partial dosage compensation in young sex-chromosomes (28–  
51 32). Theoretically, each step suffers from well-identified limitations (sup. mat. 1). However, an  
52 important global limitation is that each step has generally been considered independently from the  
53 others, resulting in a piecemeal set of models lacking integration. In particular, regulatory changes  
54 have not been consistently studied throughout the whole process. Yet, they can influence the  
55 evolution of sex-limited expression in the first step, they can contribute to compensatory adaptive  
56 silencing in the second step, and they are pivotal for the evolution of dosage compensation in the  
57 third step.

58 This paper investigates a new model that includes the joint evolution of regulatory changes  
59 and accumulation of deleterious mutations, and can lead to the evolution of an autosome into a  
60 degenerated sex chromosome with dosage-compensation. We use individual-based stochastic  
61 simulations of a population of  $N_{pop}$  diploid individuals, with XY males and XX females (sup. mat.,  
62 Fig S6). We start by considering the evolution of a pair of autosomes carrying hundreds of genes  
63 subject to partially recessive deleterious mutations, with one homolog having newly acquired a  
64 sex-determining locus. Gene expression is controlled by cis-regulatory sequences (affecting  
65 expression on the same chromosome as themselves) interacting with trans-regulators affecting the  
66 gene copies on both homologs (33). All these elements can mutate. To allow for possible dosage  
67 compensation, we assume that each gene is controlled by one male- and one female-expressed  
68 trans-regulator (Fig S6). We assume that each gene's overall expression level is under stabilizing  
69 selection around an optimal level and that the relative expression of the two copies of each gene  
70 determines the dominance level of the deleterious mutations occurring in the gene. For instance, a  
71 deleterious mutation occurring in a relatively less expressed gene copy will be less harmful than  
72 one in a relatively more expressed copy. We assume that mutations occur that suppress  
73 recombination on a segment of the Y. We refer to these mutations as inversions for simplicity,  
74 although they could correspond to other mechanisms of recombination arrest (sup. mat. 2).  
75 Inversions of any size can occur, but we follow only those on the Y that include the sex-  
76 determining locus, which will necessarily be confined to males and cause recombination arrest.  
77 We assume that inversions can “add-up”, meaning that new inversions can occur on chromosomes  
78 already carrying a previous inversion, and thus extend the non-recombining part of the Y. Finally,  
79 we assume that reversions restoring recombination can occur, and, for simplicity, that such  
80 reversions cancel only the most recent inversion (see sup. mat. 2 for justifications of these  
81 assumptions).

82 To understand the dynamics of sex chromosome evolution in this model, it is useful to first  
83 consider the case where the cis- and trans-regulators do not mutate. In this case, all inversions on  
84 the Y are eventually reversed and lost. This occurs in two steps. First, an inversion appears on a

85 given Y and “freezes” a segment of the chromosome. If, by chance, this Y carries relatively fewer  
86 or milder deleterious mutations, this “lucky” inversion has a selective advantage and consequently  
87 tends to fix in the population. This process has been described for autosomes by Nei (34), but an  
88 important difference here is that a fixed Y-linked inversion stays heterozygous in males, and  
89 therefore causes recombination arrest. In contrast, a fixed autosomal inversion is homozygous and  
90 does not cause recombination arrest. Larger inversions are overrepresented among these lucky  
91 inversions, as they contain more genes and exhibit a larger fitness variance (Fig 1A, sup. mat.1).  
92 However, after fixation among the male-determining chromosomes in the population, they start  
93 accumulating deleterious mutations due to selective interference. Fitness declines faster for larger  
94 inversions due to stronger selective interference (Fig 1C). When the inversion’s marginal fitness  
95 becomes lower than the fitness of the corresponding chromosomal segment on the X, reversions  
96 are selectively favored and spread, which restores recombination. Thus, Y-specific inversions are  
97 maintained only transiently in the population in the absence of regulatory mutations (Fig 1B).  
98 These periods of recombination suppression do not last long enough to lead to Y degeneration.

99 A radically different four-step process emerges when the regulatory sequences can mutate  
100 and evolve. A typical example is illustrated in Fig 2. It starts, as before, with the fixation of a lucky  
101 inversion on the Y. However, once the inversion stops recombination, X and Y cis-regulators can  
102 start evolving independently (step 2). We showed previously that this creates a positive feedback  
103 loop that causes rapid degeneration of Y-linked alleles (35): by chance, some genes on the Y  
104 become slightly less expressed than their X-linked alleles, and accumulate more deleterious  
105 mutations (because lower expression makes mutations more recessive), selecting for a further  
106 reduction of Y expression to make them even more recessive. This process can work on individual  
107 genes, irrespective of the size of the non-recombining region created by the inversion (35), and the  
108 degeneration does not involve selective interference. However, like in the absence of regulator  
109 evolution, recombination arrest also triggers the accumulation of deleterious mutations by  
110 selective interference, especially if the inversion includes many genes.

111 The key step is the third, which stabilizes inversions in the long term, even when they  
112 become entirely degenerated (Fig 3, Fig S4). Cis-regulator divergence and degeneration in step 2  
113 cause a departure from optimal expression levels in males. Assuming that gene expression is under  
114 stabilizing selection, this causes sex-specific trans-regulators to diverge to correct this and  
115 maintain optimal expression in both sexes. For instance, if a Y cis-regulator weakens, causing  
116 lower expression, this will favour a stronger allele of the male trans-regulator, to compensate for  
117 the low expression by increasing expression (from both alleles of the gene). The divergence of X-  
118 and Y-linked *cis*-regulators, and the divergence of sex-limited trans-regulators, automatically  
119 generate sexually-antagonistic fitness effects: X *cis*-regulators that recombine onto the Y would  
120 cause overexpression in males (due to mismatches with male trans-regulators), and similarly Y  
121 *cis*-regulators recombined onto the X would cause under-expression in females. Hence, if a  
122 reversion occurs, the reestablished recombination between X and Y would reduce offspring fitness  
123 by creating a mismatch between *cis* and *trans* regulators. This sexually antagonistic effect caused  
124 by nascent dosage compensation protects diverging inversions from reversion. This is the ultimate  
125 cause of Y recombination suppression in our model (sup. mat. 3).

126 Of course, only a minority of inversions evolve this nascent dosage compensation fast  
127 enough (relative to the speed of degeneration) to stay immune to reversion. However, a positive  
128 feedback loop is also operating here: when an inversion starts evolving dosage compensation, it  
129 becomes relatively immune to reversion and can maintain itself longer in the population, giving it  
130 more time to evolve further dosage compensation. The inversion becomes completely degenerated

131 in the final fourth step, and has complete dosage compensation (at least for dosage-sensitive  
132 genes). This leads to very strong sexually-antagonistic regulatory effects, which effectively make  
133 the inversion immune to reversions. Degeneration may also lead to loss of homology between the  
134 Y and X, definitively removing the possibility of X-Y recombination.

135 In this model, recombination suppression evolves along with regulatory evolution, and,  
136 paradoxically, selective interference opposes it and therefore tends to slow down the process. The  
137 evolution of nascent dosage compensation involves the fixation of compensatory mutations and is  
138 partly adaptive. If interference is too strong, inversions accumulate deleterious mutations too fast  
139 and are quickly replaced by reversions. Accordingly, stabilized inversions tend to be heavily biased  
140 towards small sizes, though less so when population size is larger (Fig S1C). In large populations,  
141 recombination suppression and degeneration evolve more quickly, since more inversions occur  
142 and selective interference is relatively less efficient at removing large inversions (Fig S1). Finally,  
143 as expected, this overall process is faster when the intensity of stabilizing selection on gene  
144 expression levels is strong, since this effect on fitness is the key to the evolution of dosage  
145 compensation, selectively protecting partially degenerated inversions from reversions (Fig S2).

146 This theory suggests that the Y chromosome is entangled in an inescapable regulatory trap  
147 leading to recombination arrest and degeneration even in the absence of any selective pressure  
148 related to sex-dimorphism. Indeed, unlike the current theory (10, 11, 36, 37), our model only  
149 includes genes with the same optimal expression level in males and females, and deleterious  
150 mutations that have the same effect in both sexes. This process is inherently stochastic, as it  
151 involves the rare stabilization of a handful of inversions (Fig S3 shows the high variance of the  
152 process). However, it works faster in larger populations, as selective interference (whose effect is  
153 stronger in smaller populations) opposes recombination arrest and the stabilization of large strata.  
154 It also turns current theory on its head by showing that dosage compensation can cause  
155 recombination suppression, rather than being a consequence of degeneration after such  
156 suppression. Sexually-antagonistic effects are involved in the evolution of suppressed  
157 recombination. However, they result from the fact that one sex is heterogametic, not from males  
158 and females having divergent sex-specific optima for reproductive traits or expression levels. All  
159 genes whose dosage affects fitness can contribute to the process, not just a subset of sexually-  
160 antagonistic loci. The potential sexually-antagonistic effect of dosage compensation has long been  
161 appreciated (7, 10, 11, 15, 16, 23, 38, 39). However, its potential role in recombination arrest has  
162 not been previously recognized, as it is usually thought to occur very late in the degeneration  
163 process. Once recombination has stopped, sexually-antagonistic alleles can easily occur and be  
164 maintained (10, 11, 40), but as shown here, they are not required for recombination arrest.

165 Overall, we showed that the emergence of a non-recombining and degenerated sex  
166 chromosomes in diploid organisms requires very few ingredients: genetic sex determination,  
167 deleterious mutations, inversions, sex-specific trans-regulators, and stabilizing selection on gene  
168 expression levels (Fig S5). This theory includes all steps in a single set of assumptions and is  
169 compatible with current data on sex chromosome evolution in chiasmate species (sup. mat. 3):  
170 notably the occurrence of strata, including small ones (reviewed by 5), the occurrence of early  
171 regulatory changes in young sex-chromosomes (28–32) and the lack of decisive evidence for a  
172 causal role of sexually-antagonistic loci on recombination arrest, despite decades of investigation  
173 (3, 5, 26, 27).

174 **References and Notes:**

- 175 1. We mention only XY systems below, but all argument in the paper applies equally well  
176 to ZW systems.
- 177 1. D. Bachtrog, J. E. Mank, C. L. Peichel, M. Kirkpatrick, S. P. Otto, T. L. Ashman, M. W.  
178 Hahn, J. Kitano, I. Mayrose, R. Ming, N. Perrin, L. Ross, N. Valenzuela, J. C. Vamosi, J.  
179 E. Mank, C. L. Peichel, T. L. Ashman, H. Blackmon, E. E. Goldberg, M. W. Hahn, M.  
180 Kirkpatrick, J. Kitano, I. Mayrose, R. Ming, M. W. Pennell, N. Perrin, N. Valenzuela, J.  
181 C. Vamosi, Sex determination: Why so many ways of doing it? *PLoS Biol.* **12**, 1–13  
182 (2014).
- 183 2. R. S. Pandey, M. A. Wilson Sayres, R. K. Azad, Detecting evolutionary strata on the  
184 human X chromosome in the absence of gametologous Y-linked sequences. *Genome Biol.*  
185 *Evol.* **5**, 1863–1871 (2013).
- 186 3. D. Charlesworth, Evolution of recombination rates between sex chromosomes. *Phil.*  
187 *Trans. R. Soc. B.* **372**, 20160456 (2017).
- 188 4. R. Bergero, D. Charlesworth, The evolution of restricted recombination in sex  
189 chromosomes. *Trends Ecol. Evol.* **24**, 94–102 (2009).
- 190 5. D. Charlesworth, When and how do sex-linked regions become sex chromosomes?  
191 *Evolution*. **in press** (2021), doi:10.1111/evo.14196.
- 192 6. J. J. Bull, *Evolution of sex determining mechanisms* (Benjamin Cummings, Menlo Park,  
193 CA, 1983).
- 194 7. B. Charlesworth, Model for evolution of Y chromosomes and dosage compensation. *Proc.*  
195 *Natl. Acad. Sci. U. S. A.* **75**, 5618–5622 (1978).
- 196 8. D. Charlesworth, B. Charlesworth, Sex differences in fitness and selection for centric  
197 fusions between sex-chromosomes and autosomes. *Genet. Res.* **35**, 205–214 (1980).
- 198 9. M. Nei, Linkage modification and sex difference in recombination. *Genetics.* **63**, 681–699  
199 (1969).
- 200 10. W. R. Rice, Sex chromosomes and the evolution of sexual dimorphism. *Evolution.* **38**,  
201 735–742 (1984).
- 202 11. W. Rice, The accumulation of sexually antagonistic genes as a selective agent promoting  
203 the evolution of reduced recombination between primitive sex chromosomes. *Evolution.*  
204 **41**, 911–914 (1987).
- 205 12. R. A. Fisher, The evolution of dominance. *Biol. Rev.* **6**, 345–368 (1931).
- 206 13. T. Lenormand, The evolution of sex dimorphism in recombination. *Genetics.* **163**, 811–  
207 822 (2003).
- 208 14. J. Engelstädter, Muller’s ratchet and the degeneration of Y chromosomes: A simulation  
209 study. *Genetics.* **180**, 957–967 (2008).
- 210 15. B. Charlesworth, The evolution of chromosomal sex determination and dosage  
211 compensation. *Curr. Biol.* **6**, 149–162 (1996).
- 212 16. J. E. Mank, D. J. Hosken, N. Wedell, Some inconvenient truths about sex chromosome



- 213 dosage compensation and the potential role of sexual conflict. *Evolution*. **65**, 2133–2144  
214 (2011).
- 215 17. L. Gu, J. R. Walters, Evolution of sex chromosome dosage compensation in animals: A  
216 beautiful theory, undermined by facts and bedeviled by details. *Genome Biol. Evol.* **9**,  
217 2461–2476 (2017).
- 218 18. A. Muyle, R. Shearn, G. A. Marais, The evolution of sex chromosomes and dosage  
219 compensation in plants. *Genome Biol. Evol.* **9**, 627–645 (2017).
- 220 19. J. E. Mank, Sex chromosome dosage compensation: Definitely not for everyone. *Trends*  
221 *Genet.* **29**, 677–683 (2013).
- 222 20. E. Pessia, T. Makino, M. Bailly-Bechet, A. McLysaght, G. A. B. Marais, Mammalian X  
223 chromosome inactivation evolved as a dosage-compensation mechanism for dosage-  
224 sensitive genes on the X chromosome. *Proc. Natl. Acad. Sci. U. S. A.* **109**, 5346–5351  
225 (2012).
- 226 21. J. K. Abbott, A. K. Nordén, B. Hansson, Sex chromosome evolution: historical insights  
227 and future perspectives. *Proc. R. Soc. B Biol. Sci.* **284**, 1–9 (2017).
- 228 22. D. Bachtrog, A dynamic view of sex chromosome evolution. *Curr. Opin. Genet. Dev.* **16**,  
229 578–585 (2006).
- 230 23. S. Ohno, *Sex Chromosomes and Sex-Linked Genes* (Springer Berlin Heidelberg, Berlin,  
231 Heidelberg, 1967), vol. 1 of *Monographs on Endocrinology*.
- 232 24. L. W. Beukeboom, N. Perrin, *The Evolution of Sex Determination* (Oxford University  
233 Press, 2014).
- 234 25. D. Bachtrog, Y-chromosome evolution: Emerging insights into processes of Y-  
235 chromosome degeneration. *Nat. Rev. Genet.* **14**, 113–124 (2013).
- 236 26. J. E. E. Ironside, No amicable divorce? Challenging the notion that sexual antagonism  
237 drives sex chromosome evolution. *BioEssays*. **32**, 718–726 (2010).
- 238 27. S. Ponnikas, H. Sigeman, J. K. Abbott, B. Hansson, Why do sex chromosomes stop  
239 recombining? *Trends Genet.* **34** (2018), pp. 492–503.
- 240 28. P. Veltsos, K. E. Ridout, M. A. Troups, S. C. González-Martínez, A. Muyle, O. Emery, P.  
241 Rastas, V. Hudzieczek, R. Hobza, B. Vyskot, G. A. B. Marais, D. A. Filatov, J. R.  
242 Pannell, Early sex-Chromosome evolution in the diploid dioecious plant *Mercurialis*  
243 *annua*. *Genetics*. **212**, 815–835 (2019).
- 244 29. K. H. C. Wei, D. Bachtrog, Ancestral male recombination in *Drosophila albomicans*  
245 produced geographically restricted neo-Y chromosome haplotypes varying in age and  
246 onset of decay. *PLoS Genet.*, e1008502 (2019).
- 247 30. J. Hough, J. D. Hollister, W. Wang, S. C. H. Barrett, S. I. Wright, Genetic degeneration of  
248 old and young Y chromosomes in the flowering plant *Rumex hastatulus*. *Proc. Natl. Acad.*  
249 *Sci. U. S. A.* **111**, 7713–8 (2014).
- 250 31. H. Martin, F. Carpentier, S. Gallina, C. Godé, E. Schmitt, A. Muyle, G. A. B. Marais, P.  
251 Touzet, Evolution of young sex chromosomes in two dioecious sister plant species with  
252 distinct sex determination systems. *Genome Biol. Evol.* **11**, 350–361 (2019).

- 253 32. A. Muyle, N. Zemp, C. Deschamps, S. Mousset, A. Widmer, G. A. B. Marais, Rapid de  
254 novo evolution of X chromosome dosage compensation in *Silene latifolia*, a plant with  
255 young sex chromosomes. *PLoS Biol.* **10**, e1001308 (2012).
- 256 33. M. S. Hill, P. Vande Zande, P. J. Wittkopp, Molecular and evolutionary processes  
257 generating variation in gene expression. *Nat. Rev. Genet.* **22**, 203–215 (2021).
- 258 34. M. Nei, K. I. Kojima, H. E. Schaffer, Frequency changes of new inversions in populations  
259 under mutation-selection equilibria. *Genetics.* **57**, 741–750 (1967).
- 260 35. T. Lenormand, F. Fyon, E. Sun, D. Roze, Sex chromosome degeneration by regulatory  
261 evolution. *Curr. Biol.* **30**, 3001-3006.e5 (2020).
- 262 36. T. Connallon, A. G. Clark, Evolutionary inevitability of sexual antagonism. *Proc. Roy.  
263 Soc. Lond. B.* **281**, 20132123 (2014).
- 264 37. C. Cheng, M. Kirkpatrick, Sex-specific selection and sex-biased gene expression in  
265 humans and flies. *PLoS Genet.* **12**, 1–18 (2016).
- 266 38. C. Mullon, A. E. Wright, M. Reuter, A. Pomiankowski, J. E. Mank, Evolution of dosage  
267 compensation under sexual selection differs between X and Z chromosomes. *Nat.  
268 Commun.* **6**, 1–10 (2015).
- 269 39. J. Engelstädter, D. Haig, Sexual antagonism and the evolution of X chromosome  
270 inactivation. *Evolution.* **62**, 2097–2104 (2008).
- 271 40. P. Muralidhar, Mating preferences of selfish sex chromosomes. *Nature.* **570**, 376–379  
272 (2019).
- 273 41. F. Manna, G. Martin, T. Lenormand, Fitness landscapes: An alternative theory for the  
274 dominance of mutation. *Genetics.* **189** (2011), doi:10.1534/genetics.111.132944.
- 275 42. H. Ellegren, J. Parsch, The evolution of sex-biased genes and sex-biased gene expression.  
276 *Nat. Rev. Genet.* **8**, 689–698 (2007).
- 277 43. L. Rowe, S. F. Chenoweth, A. F. Agrawal, The genomics of sexual conflict. *Am. Nat.* **192**,  
278 274–286 (2018).
- 279 44. R. Bonduriansky, S. F. Chenoweth, Intralocus sexual conflict. *Trends Ecol. Evol.* **24**, 280–  
280 288 (2009).
- 281 45. C. D. Meiklejohn, J. Parsch, J. M. Ranz, D. L. Hartl, Rapid evolution of male-biased gene  
282 expression in *Drosophila*. *Proc. Natl. Acad. Sci. U. S. A.* **100**, 9894–9899 (2003).
- 283 46. P. Milesi, B. S. Assogba, C. M. Atyame, N. Pocquet, A. Berthomieu, S. Unal, P.  
284 Makoundou, M. Weill, P. Labbé, The evolutionary fate of heterogeneous gene  
285 duplications: A precarious overdominant equilibrium between environment, sublethality  
286 and complementation. *Mol. Ecol.* **27**, 493–507 (2018).
- 287 47. D. Bachtrog, The temporal dynamics of processes underlying Y chromosome  
288 degeneration. *Genetics.* **179**, 1513–1525 (2008).
- 289 48. J. Maynard Smith, *The evolution of sex* (1978).
- 290 49. S. Ahmed, J. M. Cock, E. Pessia, R. Luthringer, A. Cormier, M. Robuchon, L. Sterck, A.  
291 F. Peters, S. M. Dittami, E. Corre, M. Valero, J. M. Aury, D. Roze, Y. Van De Peer, J.

292 Bothwell, G. A. B. Marais, S. M. Coelho, A haploid system of sex determination in the  
293 brown alga *ectocarpus* sp. *Curr. Biol.* **24**, 1945–1957 (2014).

294 50. S. Branco, H. Badouin, R. C. Rodríguez De La Vega, J. Gouzy, F. Carpentier, G.  
295 Aguilera, S. Siguenza, J. T. Brandenburg, M. A. Coelho, M. E. Hood, T. Giraud,  
296 Evolutionary strata on young mating-type chromosomes despite the lack of sexual  
297 antagonism. *Proc. Natl. Acad. Sci. U. S. A.* **114**, 7067–7072 (2017).

298 51. L. Boyer, R. Zahab, M. Mosna, C. Haag, T. Lenormand, Not So Clonal Asexuals:  
299 Unraveling The Secret Sex Life Of *Artemia parthenogenetica*. *Evol. Lett.* **5**, 164–174  
300 (2021).

301

302 **Acknowledgments:** We thank D. Charlesworth, G. Marais, Y. Michalakis for comments and  
303 suggestions, and K McKean for editing. We thank MBB cluster from Labex CEMEB, and CNRS  
304 ABiMs cluster. **Funding:** This work was supported by grant GenAsex ANR-17-CE02-0016-01.

305 **Author contributions:** Original idea TL, DR; Model conception TL, DR; Code DR, TL;  
306 Simulations TL; Data analyses TL; Interpretation TL, DR; First draft, editing and revisions TL, DR;  
307 Project management and funding TL. **Competing interests:** the authors declare no conflict of  
308 interest. **Data and materials availability:** simulation code will be available after publication on  
309 GitHub.



310

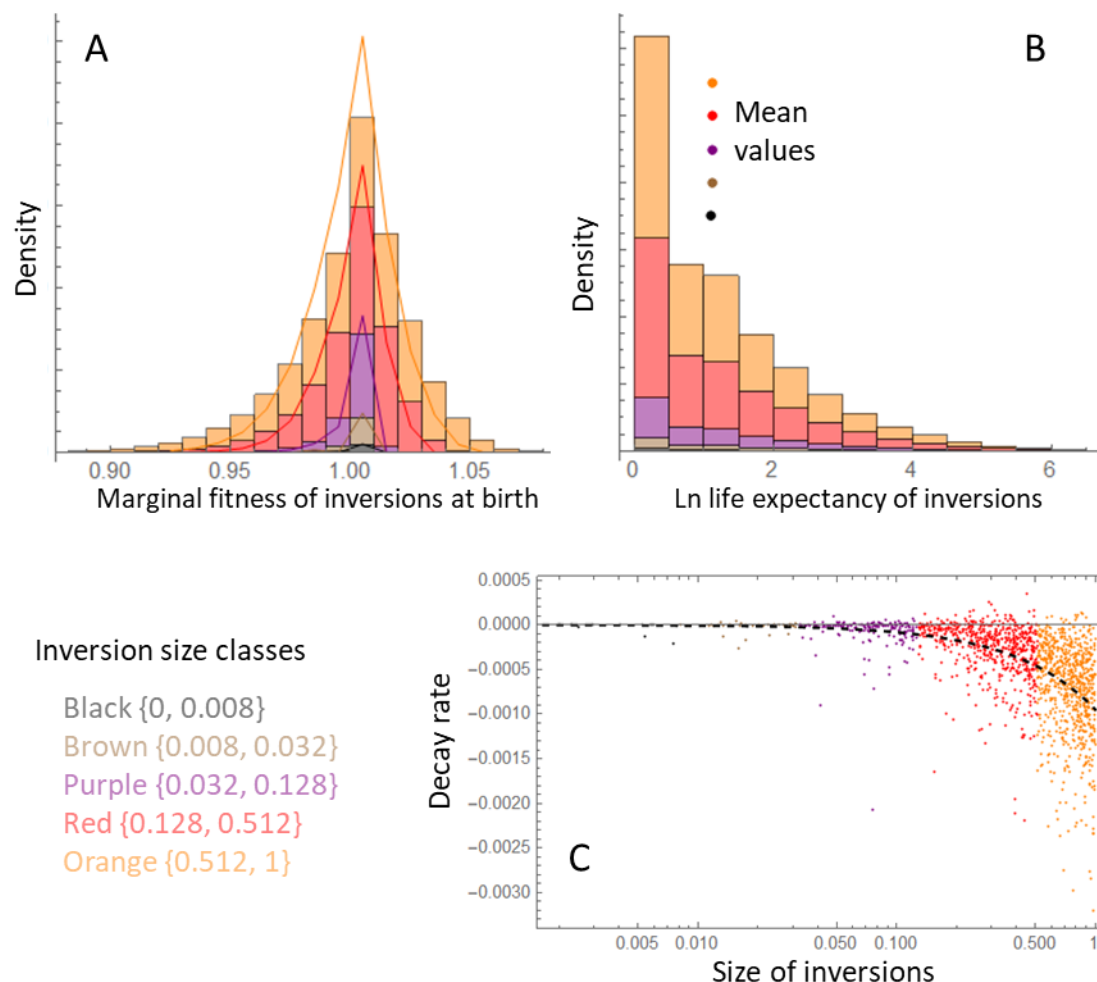

311

312 **Fig 1.** Characteristics of inversions in the absence of regulatory evolution. (A) Cumulated

313 distributions of the marginal fitness of newly arising inversions for different size classes of

314 inversions (the different colors, legend at bottom left; the whole chromosome has size 1 on this

315 scale, the sex-determining locus being located at one end of the chromosome). When an inversion

316 arises, the corresponding chromosomal segment carries by chance more or less deleterious

317 mutations than average, resulting in a variance in marginal fitness. Lines: expectations computed

318 assuming a Poisson distribution of the number of mutations per inversion, each with a fixed effect

319  $s = s_{mean}$ ). (B) Distribution of the log time before inversions become extinct for the different size

320 classes (in number of generations). These distributions have approximately the same mean values

321 (indicated by the corresponding color dots, on an arbitrary y-scale). (C) Marginal fitness decay

322 rate per generation for inversions (y-axis), as a function of their size (x-axis, log scale). Inversions

323 accumulate deleterious mutations because of selective interference. This decay rate is computed

324 over the first 50 generations on the relative marginal fitness of newly arising inversions. Only

325 inversions lasting at least 50 generations are therefore represented. The dashed line is the least

326 square fit of a power law yielding  $y = -0.00095x^{1.06}$ , indicating that this decay rate varies

327 approximately linearly with inversion size. Parameter values are described in methods ( $N_{pop} = 10^4$ ,

328  $I = 0.1$ ), but with no mutation on regulators ( $U_c = U_t = 0$ ).

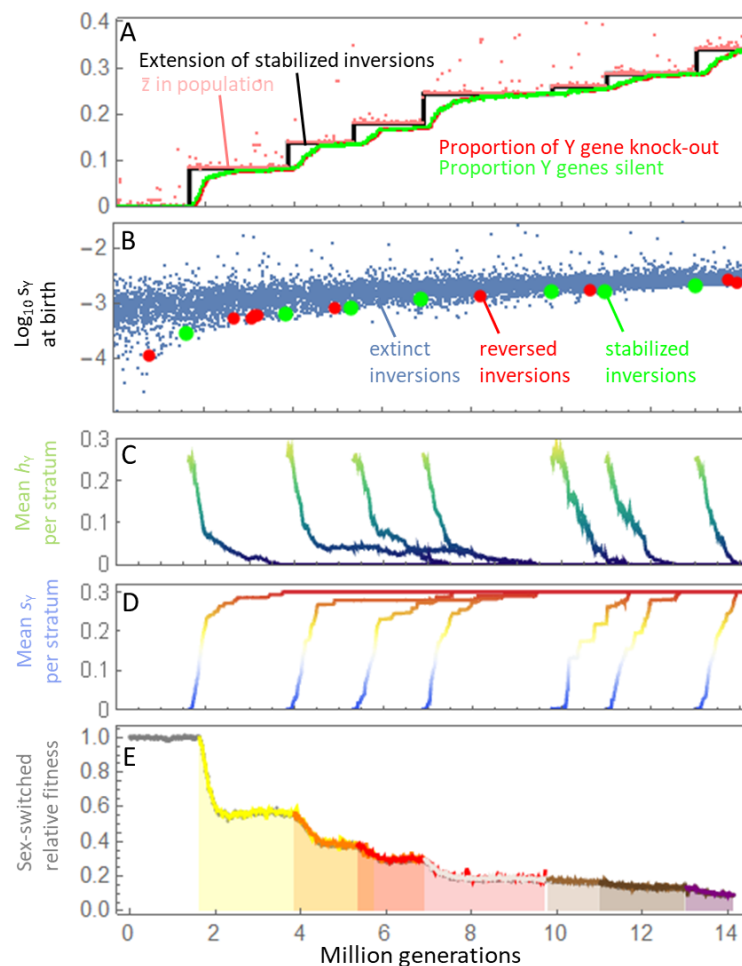

329  
 330 **Fig 2.** Example of a typical Y degeneration process. The Y progressively degenerates by the  
 331 accumulation of inversions, which accumulate deleterious mutations, evolve dosage compensation  
 332 with sex-antagonistic fitness effects, and become immune to reversions. (A) Black stairplot:  
 333 extension of each successive stratum of the Y (expressed as the fraction of the physical length of  
 334 the Y), corresponding to stabilized inversions. Pink dots : average fraction of the non-recombining  
 335 Y in the population ( $\bar{z}$ ). Green: proportion of Y genes that are silenced. Red: proportion of Y genes  
 336 that accumulate deleterious mutations effects up to  $s_{max}$  (here  $s_{max} = 0.3$ ), corresponding to a gene  
 337 knock out. (B)  $\text{Log}_{10}$  of the average effect of deleterious mutations carried by inversions when  
 338 they first arise in the population (averaged over the different genes within the inversion). Blue  
 339 dots: random subsample of inversions that are eventually lost before fixing in the population. Red  
 340 dots: inversions that reach fixation, but become extinct after the occurrence of a reversion. Green  
 341 dots: inversions that reach fixation, and last until the end of the simulation (stabilized inversions),  
 342 becoming strata on the Y. (C) Mean dominance of deleterious mutations on each stabilized  
 343 inversion (initial dominance of deleterious mutations is 0.25). (D) Accumulation of deleterious  
 344 mutation on each stabilized inversion (the maximum effect  $s_{max}$ , is set to 0.3 for all genes). (E)  
 345 Fitness that the Y carrying the stabilized inversions would have on average, if expressed in a  
 346 female (relative to the actual average fitness of males). The different colors highlight the  
 347 occurrence of the successive strata. The average fitness of males that would carry two X  
 348 chromosomes at that time is indicated in gray, but yields the same values. Parameter values are  
 349 described in the methods section ( $N_{pop} = 10^4$ ,  $I = 0.1$ ).

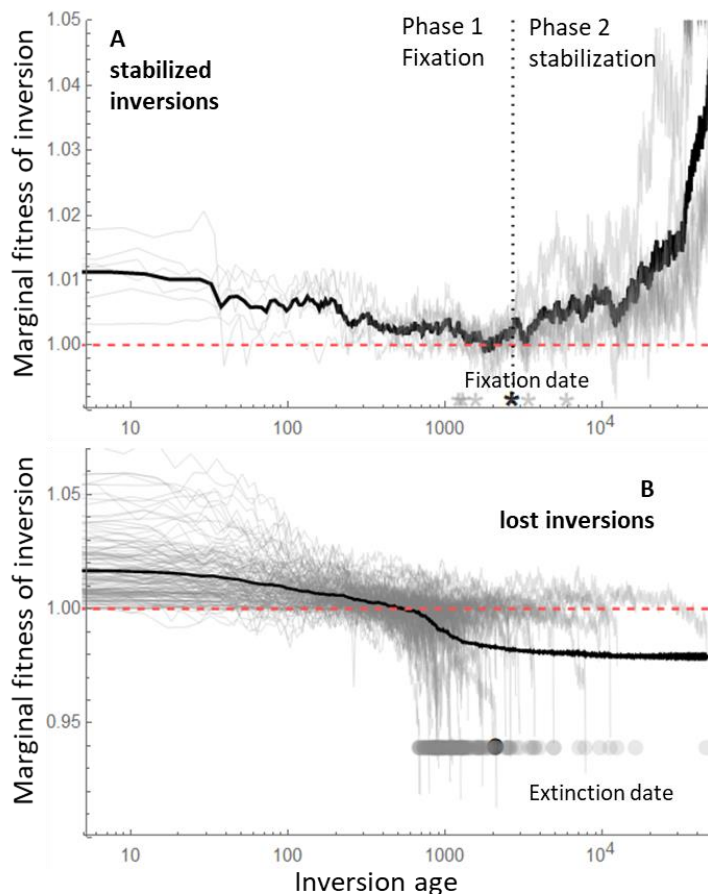

350  
 351 **Fig 3.** Fitness trajectories of stabilized and lost inversions. *x*-axis, inversion age: the number of  
 352 generations since the appearance of the inversion (in log-scale). *y*-axis : marginal fitness of the  
 353 inversion relative to the same chromosomal segment on the X if it was in a male ( $W_{margX}$ , see  
 354 methods). After fixation, this measures the sexually-antagonistic effect of nascent dosage  
 355 compensation. The marginal fitness of the inversion relative to the same chromosomal segment  
 356 among Y chromosomes not carrying the inversion ( $W_{margY}$ , see method) yields undistinguishable  
 357 results before the inversion fixes and is therefore not shown to not overload the figure (note that  
 358  $W_{margY}$  cannot be computed after the inversion fixes as all Y chromosomes carry the inversion). In  
 359 gray, individual trajectories, in black average values. **(A)** Inversions that are stabilized as first Y  
 360 strata, collected over 10 evolutionary replicates after 1 million generation. Their fixation date is  
 361 indicated by a star at the bottom. **(B)** Inversions that are in the top 15 longest lived ones before a  
 362 first stratum is stabilized, collected over 10 evolutionary replicates over 1 million generation. Their  
 363 extinction date is indicated by a gray disk at the bottom. The time averaged fitness at time *t* (in  
 364 black) is computed over all inversions, counting their last achieved fitness if they are extinct at *t*.  
 365 Red dashed line indicates value 1.

## 366 **Methods:**

### 367 **1. Model**

#### 368 *Genome*

369 We use a simplified sex chromosome model (35) that includes a sex determining locus at one end  
370 and  $n_L = 500$  coding genes  $G$ . The expression of each gene is controlled by a *cis*-regulator  $C$ , and  
371 *two* trans-regulators  $T_m$  and  $T_f$  each of which is expressed either in males or in females. We assume  
372 that  $G$  and  $C$  sequences are uniformly spaced along the sex chromosome, with adjacent genes  $G$   
373 recombining at a rate  $R_g$  (initially in both sexes), and each  $C$  regulator being closer to the  $G$  gene  
374 it regulates (at recombination rate  $R_c$ ,  $R_c < R_g$ , Fig S6). Our simulations use  $R_g = 0.0005$  (resulting  
375 in an initial overall map length of 25 cM), and  $R_c = R_g/10$ . Trans-regulators, such as transcription  
376 factors, are unlinked to their target genes, and influence expression on both homologs, whereas  
377 *cis*-regulators, such as enhancers, affect expression only of the gene carried on the same  
378 chromosome as themselves (33). Trans-regulators with sex-limited effects are necessary for  
379 dosage compensation to evolve (35). For simplicity, we assume that these  $T$  loci are autosomal.

#### 380 *Inversions and reversions*

381 We assume that inversions occur on the Y at a rate  $U_{inv}$ . We only consider inversions that include  
382 the sex locus (other inversions are not relevant to the topic investigated here as they are not  
383 confined to males). We denote  $z$  the non-recombining fraction of the Y ( $z$  is therefore comprised  
384 between 0 and 1). This variable is also used to measure the endpoint of each inversion on the map.  
385 When  $z = 0$ , X and Y chromosomes recombine freely, but otherwise X-Y recombination only  
386 occurs within the chromosomal segment  $[z, 1]$ . When  $z = 1$ , the X and Y do not recombine at all.  
387 When a new inversion occurs, its size is drawn as a uniform fraction of the non-recombining part  
388 of the Y. Specifically, on a Y where recombination is already stopped between 0 and  $z_i$ , the arrest  
389 of recombination will extend, after the new inversion  $i+1$  to  $z_{i+1} = z_i + (1 - z_i)u$ , where  $u$  is a  
390 uniform deviate between 0 and 1. Finally, we assume that reversions can also occur, at a rate  $U_{rev}$ ,  
391 removing the last inversion on the non-recombining part of the Y (we use  $U_{inv} = U_{rev} = 10^{-5}$ ).

#### 392 *Regulatory traits*

393 The effects of alleles at the *cis*- ( $C$ ) and *trans*-regulators ( $T_m$ ,  $T_f$ ) are modelled as quantitative traits,  
394 with Gaussian mutations, denoted by  $c$ ,  $t_m$ ,  $t_f$ , respectively. These regulators control allele-specific  
395 expression as well as the overall level of expression  $Q$  of each gene. Mutations in *cis* and *trans*  
396 regulators are assumed to occur at rates  $U_c$  and  $U_t$ , respectively, and add a Gaussian deviate to  
397 allelic values for these traits ( $c + dc \sim N(0, \sigma_c)$ ,  $t + dt \sim N(0, \sigma_t)$ ). We use  $\sigma_c = \sigma_t = 0.2$  and  
398  $U_t = U_c/2 = 10^{-4}$ . Negative trait values are counted as zero. These values are used to compute  
399 the total and allele-specific expression values for each coding gene  $G$ , as explained below. Note  
400 that we introduced two trans-regulators per gene, one expressed in males, and the other in females.  
401 We could instead assume a single trans-regulator determining two independent traits in males and  
402 females, which would be equivalent. The key is that sex specific trans-regulation is possible, so  
403 that dosage-compensation can occur. Some genes may be unable to quickly evolve sex-specific  
404 regulation. If included, they would not diverge between X and Y, and they would therefore not  
405 contribute to recombination arrest.

#### 406 *Allele-specific expression and dominance*

407 Arbitrarily denoting with a 1 or 2 subscript two alleles at a gene locus  $G$ , we assume that the  
408 fraction of the protein expressed from allele 1 is  $\phi_{1,i} = c_{1,i}/(c_{1,i} + c_{2,i})$ . This ratio measures the  
409 degree of allele-specific expression. With  $\phi = 1/2$  (i.e. with equally strong cis-regulators on both  
410 homologs), alleles are co-expressed, while a departure from  $1/2$  indicates that one allele is relatively  
411 more expressed than the other. The dominance of deleterious mutations occurring on the gene  $G$   
412 depends on this allele-specific expression and is given by

$$413 \quad 414 \quad h_{1,i} = \phi_{1,i}^{-\ln(h)/\ln(2)} \quad \text{(Eq. 1).}$$

415  
416 where  $h$  is a parameter measuring the dominance of the fitness effect of deleterious mutations in a  
417 heterozygote when both alleles are equally expressed (with  $\phi_{1,i} = 1/2$ , we have  $h_{1,i} = h$ ). We  
418 set  $h = 0.25$ , corresponding to the average value observed across species (41).

#### 419 *Deleterious mutations on genes*

420 Deleterious mutations occur on genes  $G$  at a rate  $U_G$  per gene. Their fitness effect  $s$  is drawn from  
421 an exponential distribution with mean  $s_{mean}$ . We use  $s_{mean} = 0.05$ . The effects of multiple mutations  
422 in the same gene are assumed to be additive, but can be cumulated only up to a maximum effect  
423 per gene,  $s_{max}$  (measuring the fitness effect of the gene knock-out). Their dominance depends on  
424 the strength of their associated cis-regulator. The more they are expressed (relative to the other  
425 allele), the larger their effective dominance, as explained above. The fitness effect resulting from  
426 the presence of deleterious mutations in gene  $i$  is

$$427 \quad 428 \quad W_i^G = 1 - s_{2,i} - h_{1,i}(s_{1,i} - s_{2,i}) \quad \text{(Eq. 2).}$$

429  
430 where, by convention subscript 1 denotes the most deleterious allele of the two present in a given  
431 individual for that gene  $i$ .

#### 432 *Stabilizing selection on expression levels*

433 We assume that the overall expression level of coding genes is under stabilizing selection with an  
434 optimum value  $Q_{opt}$ . In males, the total expression level  $Q_i$  equals  $(c_{1,i} + c_{2,i})\bar{t}_{m,i}$ , where  $\bar{t}_{m,i}$  is  
435 the average strength of the trans-regulators expressed in males, which assumes that both cis- and  
436 trans-regulators are essential for proper expression (neither can be zero). Symmetrically, it is  
437  $(c_{1,i} + c_{2,i})\bar{t}_{f,i}$  in females. We assume that  $\ln(Q_i)$  is under Gaussian stabilizing selection around  
438  $\ln(Q_{opt})$  (with  $Q_{opt} = 2$ ). We use log-scale to ensure that, irrespective of the intensity of stabilizing  
439 selection, the fitness effect of complete regulatory silencing ( $Q_i = 0$ ) would be  $s_{max}$ , the maximum  
440 possible fitness effect of deleterious alleles on the coding gene, which we assume to be the same  
441 as the effect of a gene knock-out. Denoting by  $I$  the intensity of stabilizing selection on the  
442 expression level, the fitness resulting from the departure from optimal dosage  $W_i^Q$  is

$$443 \quad 444 \quad W_i^Q = 1 - s_{max} \left( 1 - e^{-I(\ln Q_i - \ln Q_{opt})^2} \right) \quad \text{(Eq. 3).}$$

445



446 This function is equivalent to assuming that fold-changes in expression levels are under symmetric  
447 stabilizing selection, while selection on expression levels  $Q_i$  is asymmetric. Unless otherwise  
448 stated, we use  $I = 0.1$ .

#### 449 *Individual fitness*

450 Individual fitness is contributed by two components: the fitness consequences of carrying  
451 deleterious mutations in the coding gene (whose dominance depends on allele-specific  
452 expression),  $W_i^G$ , and stabilizing selection on overall expression level  $W_i^Q$ . The overall fitness of  
453 an individual is computed as the product over all genes  $i$  of  $W_i^G W_i^Q$ .

#### 454 *Sexual dimorphism*

455 It is important to note that our model does not include traits selected to be different in males and  
456 females. All the genes we consider have exactly the same expression optimum in males and  
457 females and we only consider deleterious mutations on genes that have the exact same effect in  
458 males and females. The presence of a sex-determining locus and sex-specific trans-regulators  
459 implies the existence of some sexually dimorphic traits coded somewhere in the genome, but these  
460 traits are absent from the simulations and therefore play no role in the results.

#### 461 *Life cycle and simulations*

462 The different events of the life cycle occur in the following order: diploid selection, meiosis with  
463 recombination, mutation, and syngamy. Simulations are initialized with  $N_{pop}$  individuals, no  
464 polymorphism present, fully recombining sex-chromosomes and optimal gene expression levels  
465 (no deleterious allele, all  $c$  and  $t_m, t_f$  alleles fixed to 1, all Y chromosome with  $z = 0$ ). After a burn-  
466 in phase, mutations producing inversions and reversions are turned on and we follow the dynamics  
467 of the system. Unless otherwise stated, we use  $N_{pop} = 10^4$ .

#### 468 *Measures*

469 At regular time steps, we record average regulatory trait values in the population, mean fitness of  
470 males and females, average effect of deleterious mutations on the Y ( $s_Y$ ), average dominance of  
471 mutations on the Y ( $h_Y$ ),  $P_{silent}$  the probability that  $\phi_{Y,i}$  becomes close to zero (below 0.01) so that  
472 alleles on the Y become nearly entirely recessive (averaged over all genes),  $P_{dead}$  the probability  
473 that deleterious mutations on Y gene copy have reduced fitness by an amount  $s_{max}$ , indicating that  
474 the gene has entirely degenerated on the Y (averaged over all genes), and the average length of the  
475 non-recombining portion of the Y ( $z$ ). We also record average “sex-switched” fitness, i.e. the  
476 average fitness of females computed replacing one of their X by a randomly drawn Y, and the  
477 average fitness of males computed replacing their Y by a randomly drawn X (relative to female  
478 and male average fitnesses, respectively).

479 We record all inversions occurring in the population (time of occurrence, start and end point,  $s_Y$ ,  
480  $h_Y$ , frequency, average regulatory traits, marginal fitnesses). We compute the marginal fitnesses of  
481 inversions (denoted  $W_{margY}$ ) as the product of  $W_i^G W_i^Q$  for all genes carried by this inversion  
482 (averaged over all Y chromosomes carrying this inversion), relative to the same product computed  
483 over all Y chromosomes not carrying this inversion. This quantity indicates whether inversions  
484 involve segment of the Y chromosome that present a higher or lower fitness effect compared to  
485 the equivalent non-inverted Y segment in the population. We also compute this marginal fitness  
486 relative to the average fitness effect of the same chromosomal segment sampled from an X  
487 chromosome, and placed in a male carrying the inversion (we use 1000 such samples to compute

488 this value). Indeed, when a reversion occurs, followed by recombination events, it creates new Y  
489 chromosomes including (part of) this homologous X segment. We denote this quantity  $W_{margX}$ . It  
490 measures the average fitness of recombinant Y, relative to the actual Y, and therefore whether  
491 reversions could be selectively favored (if  $W_{margX} < 1$ ). When  $W_{margX} \gg 1$ , it indicates that  
492 reversions and recombinant Y have a much lower fitness than current Y in the population, which  
493 is the signature of ‘stabilized inversions’.

## 494 **Supplementary Material**

### 495 **1. Some limitations of current models**

#### 496 *Recombination arrest*

497 Current theory for Y recombination arrest is mostly based on the idea that the evolution of sexually  
498 dimorphic traits involves sexually antagonistic loci (SA-loci), where mutations occur that are  
499 beneficial in one sex, but deleterious in the other. If SA-loci are widespread, some would inevitably  
500 occur on the sex-chromosomes, which would then favor the evolution of tight linkage with the  
501 sex-determining locus. There is ample evidence for sexual conflict in general, making this  
502 assumption plausible. However, the role of SA-loci in Y recombination arrest is not demonstrated  
503 empirically (3, 5, 26, 27). This demonstration is inherently difficult to make because SA-loci are  
504 difficult to detect and because they can occur after the recombination arrest. Hence, whether this  
505 theory explains why sex chromosomes stop recombining is still entirely open.

506 One limitation of this hypothesis is that sex-linkage is only a particular way to solve  
507 intralocus sexual conflicts. Other resolutions based on regulatory evolution can occur as well (42–  
508 44), and the question is really whether these resolutions are more or less likely to evolve than sex-  
509 linkage. (a) In the simplest case, the sexual conflict is on the level of expression of a given protein.  
510 In this case, sex-specific trans-regulators can easily adjust optimal expression in both sexes,  
511 solving the conflict. (b) In a second case, a particular protein modification is favourable in one sex  
512 but needs not to be expressed in the other. This locus can evolve to be expressed only in the sex  
513 where it is favourable, by changing either cis or sex-specific trans-regulators, solving the conflict.  
514 (c) In a third case, two versions of a protein are favourable, each in one sex, but this protein needs  
515 to be expressed in both sexes. Here, the conflict can be solved by evolving an heterogeneous gene  
516 duplication with each copy becoming expressed in the sex where it is favourable  
517 (“subfunctionalization” scenario). These genetic changes can evolve rapidly. Evolution of sex-  
518 specific expression is rapid (42, 45) and evidence for SA-polymorphism is limited compared to  
519 the signature of resolved expression differences (43). Even the most constrained case (c) may  
520 evolve rapidly, as demonstrated by the astonishing diversity of newly emerging heterogeneous  
521 gene duplication that have been documented at extremely short time scales in some cases (46).

522 Our model also suggests other limitations to the sexual antagonism theory. It is possible to  
523 propose a variant of our model where the initial fixation of inversions is promoted by the presence  
524 of a SA-locus. However, this appears unnecessarily complex, as such inversions will inevitably  
525 occur and fix without those SA loci by capturing “lucky” chromosomal segments with fewer  
526 deleterious mutations, which is a very potent mechanism. Then, regulatory sex-antagonistic effects  
527 will inevitably emerge if early dosage compensation is allowed, as we show, abolishing the need  
528 for SA locus. Finally, even if recombination suppression is caused by the presence of a SA locus,  
529 it may not be robust to the occurrence of reversions. The protection of the SA locus against  
530 reversion would last only to a point: until the fitness decay caused by degeneration becomes larger  
531 than this SA effect. This limitation is not operating with the regulatory model we propose as the

532 protection grows with time (by the accumulation of dosage compensation and its growing  
533 “protecting” sex-antagonistic effect).

#### 534 *Degeneration*

535 Models about sex-chromosome degeneration are based on selective interference once  
536 recombination is stopped. A limitation of these models is that they tend to be inefficient in large  
537 populations or on small non-recombining regions, and especially if only deleterious mutations are  
538 considered (14, 15, 47). Selective interference is inevitable in absence of recombination, but it may  
539 not be the only process causing degeneration. We previously showed that cis-regulatory  
540 divergence after recombination arrest could efficiently lead to Y silencing and degeneration, in  
541 absence of selective interference (35). This process works faster and can explain degeneration of  
542 very small non-recombining regions. Here too, there is ample evidence that selective interference  
543 occurs, but there is currently no evidence that it is the only mechanism at work, especially in  
544 species with large population sizes and small degenerated strata.

#### 545 *Dosage compensation*

546 Dosage compensation (DC) tends to be considered separately from the process of degeneration  
547 and always assumed to evolve late, as reported in virtually all papers and textbooks since Ohno's  
548 1967 book (23). This claim is based on the causal chain of events: in current theory, DC results  
549 from degeneration, not the other way around. In fact, degeneration and DC are likely to be nearly  
550 simultaneous, at least for dosage sensitive genes, in any viable theory, as otherwise males would  
551 suffer an unbearable fitness decline relative to females during Y degeneration. However, models  
552 incorporating degeneration and DC tend to be currently missing, with some exceptions (14, 39).  
553 We recently showed that silencing and DC could theoretically occur slightly before and cause  
554 rather than result from degeneration (35).

## 555 **2. Inversion and reversion assumptions**

#### 556 *Inversions*

557 The model assumes Y-carried mutations that stop recombination on a portion of the Y (and that  
558 this non-recombining region can be later extended or reduced). It helps to think that these  
559 mutations correspond to inversions, but there is really nothing ‘inversion-specific’ in the model.  
560 Chromosome collinearity is not altered in the code, and there is no specific assumptions  
561 determining how recombination proceeds on non-perfectly collinear chromosomes. The non-  
562 recombining region is determined using the variable  $z$ . Recombination does not occur between 0  
563 and  $z$  and occurs between  $z$  and 1. “Inversion” mutations only alter this  $z$  value, but do not specify  
564 the exact mechanism by which this recombination arrest actually takes place. Hence, the results  
565 presented extend to other mechanisms of recombination arrest, as long as they involve a genetic  
566 change occurring on the Y (e.g. heterochromatinisation, hotspot presence etc.). In addition, the  
567 mutations considered here may not represent “real” inversions. Large real inversions do not  
568 necessarily create complete linkage across the inverted region, as double crossovers may be  
569 possible. Thus, the inversion that we consider would correspond to the non-recombining part of  
570 real inversions. This issue is however minimized by the fact that large inversions do not contribute  
571 to recombination arrest in our model (Fig S1C, S2C).

#### 572 *Reversion*

573 We introduced reversions to make sure recombination arrest is not unescapable. Without this,  
574 inversions would inevitably occur and fix quickly, and no specific explanation would be required

575 for Y recombination arrest. Such a model would be rather superficial, since the outcome would  
576 directly results from this hypothetical constraint. A similar mistake was made in early sex-  
577 chromosome models, which assumed that deleterious mutations could only occur on the Y and  
578 then concluded that the Y would inevitably degenerate.

579 We considered another model for reversion, where each reversion was restoring  
580 recombination on all the Y, not just canceling the last inversion. This other model lead to similar  
581 results suggesting that it does not matter much how precisely recombination can be restored, as  
582 long as it can. This other model involved however more complex dynamics. One of its specificity  
583 is to make reversions less and less likely as the Y degenerates, by introducing a strong dependence  
584 between successive strata. In particular, a new inversion can be protected from reversions by the  
585 sex-antagonistic effects accumulated on other previous strata. This model also introduces coupled  
586 reversion-inversion dynamics, since a reversion can only persist if it is immediately followed by  
587 an inversion that stops recombination on the part of the Y that is already degenerated.

588 Other model of reversions could be imagined, but most other solutions would be computationally  
589 challenging to perform. For instance, reversion breakpoints could be randomly sampled anywhere  
590 in the non-recombining region. Such an approach would create each time a new inversion (with a  
591 new starting and ending point). Since we need to keep track of all inversions, this adds an important  
592 computational burden, without adding any interesting process. Another, very complicated way to  
593 allow for recombination restoration, would involve inversion on the X. If an inversion is present  
594 on the Y, but an inversion also occurs on the X, it could partially restore recombination, but this  
595 model would be extremely complex to run and analyze as it would require to keep track of X and  
596 Y collinearity and introduce complex additional assumptions to decide how recombination  
597 proceeds on non-perfectly collinear chromosomes. It would also require doing very complex  
598 bookkeeping of all possible chromosome orderings, including inversions that do not include the  
599 sex-determining locus.

### 600 **3. Comparison to current theory and empirical observations**

601  
602 Comparisons of different theories can be made on several grounds that we can broadly categorize  
603 in terms of plausibility, parsimony and predictive power.

#### 604 *Plausibility*

605 The model we propose involves a very general process with almost no specific assumption. All  
606 ingredients are basic genetic features of eukaryotes, such as deleterious mutations, *cis* and *trans*-  
607 regulators, inversions, stabilizing selection on dosage, and partial dominance. All these features  
608 have been extensively demonstrated. It also includes more specific assumptions, such as the  
609 occurrence of genetic mutations that can alter recombination rate on the Y, in a reversible manner.  
610 There is ample evidence for genetic variation in recombination rates, and this is an ingredient that  
611 must be present in any theory aiming at explaining Y recombination arrest. As discussed above,  
612 our way to represent reversion is certainly a drastic simplification, yet other models of Y  
613 recombination arrest do not even include the possibility of a restauration of recombination,  
614 especially once degeneration has started to occur. As we show in the model without regulatory  
615 evolution, if this possibility is included, degeneration would not occur on the long run, as  
616 reversions allow eliminating partially degenerated Y from the population. The presence of a sex-  
617 antagonistic polymorphic locus is also unlikely to be sufficient to counteract this process. The  
618 model we propose naturally generates ever increasing sex-antagonistic effects, which accumulate  
619 over all dosage sensitive genes, and naturally increase with the degree of degeneration. Hence, this

620 mechanism is more likely to consistently favor the maintenance of recombination suppression than  
621 the occurrence of a handful of isolated loci with sex-antagonistic effects. Models allowing for  
622 dynamical accumulation of sex-antagonistic alleles might be possible, but they have not been  
623 worked out, and probably demand that an unrealistic large fraction of genes is involved in sexual  
624 dimorphism. Our model distinguish a proximal and ultimate cause for recombination arrest. The  
625 origin and maintenance of recombination suppression have distinct causes. Initially, there is no  
626 selection against recombination. However, a fortuitous but selective phenomenon (lucky inversion  
627 spread and fixation) causes a selection pressure against recombination that was previously absent  
628 (the quick emergence of regulatory sex-antagonistic effects), and which protect this inversion from  
629 being subsequently lost. Distinguishing the problem of origin and the maintenance of a trait has  
630 often been considered in other contexts, notably the evolution of sex (48).

### 631 *Parsimony*

632 The theory we propose tends to be more parsimonious than current theory. It makes loci with sex-  
633 antagonistic effects superfluous, while all the ingredients present in our model are required in any  
634 global theory of sex chromosomes. For instance, deleterious mutations are necessary for  
635 degeneration, sex-specific regulatory changes are necessary for dosage compensation, and  
636 mutation altering recombination are necessary to explain recombination suppression. It is also  
637 parsimonious as it explains all the process of Y recombination arrest, degeneration and dosage  
638 compensation in a single model where all steps are integrated and work consistently within the  
639 same set of assumptions. In contrast, current theory is mostly made of series of models addressing  
640 each step separately, with different sets of assumptions.

### 641 *Predictive power*

642 Compared to current theory, our theory explains the same global pattern seen across many  
643 eukaryotes. Y or W chromosomes are often non-recombining, degenerated and at least partially  
644 dosage-compensated. Even if the causal explanation for each of these steps differs between current  
645 theory and the theory presented in this paper, observations distinguishing them may not be  
646 available yet. The “established model” lacks decisive empirical support, despite decades of  
647 investigations. In particular, there is no firm evidence that sex-antagonistic loci cause  
648 recombination suppression. However, absence of evidence is not evidence of absence, and the  
649 mechanism works in principle. There is ample evidence for the existence of male female  
650 antagonistic selection, indicating that this explanation could work. In comparison, there is no  
651 indication that early dosage compensation on dosage-sensitive genes generates sex-antagonistic  
652 effects on young sex chromosome, but this has not been looked for. There are indications of early  
653 evolution of dosage compensation or regulatory evolution in some species. This is an essential  
654 piece of information, consistent with our theory, but not proving that recombination arrest is  
655 caused by these modifications. Current theory does not predict a particular size for Y chromosome  
656 strata. It is however difficult to explain that small strata degenerate by selective interference if they  
657 contain only few genes. Our theory tend to indicate that rather small strata are involved in  
658 recombination arrest, although the exact size depends on details that we did not investigate. For  
659 instance, if there is an important heterogeneity for dosage sensitivity among genes, strata size could  
660 be partly dictated by the chance localization of genes that are strongly dosage sensitive. In any  
661 case, our theory can certainly explain better why small strata can occur and degenerate. It may also  
662 easily explain cases where divergence appears nearly continuous along the X-Y chromosome pair,  
663 as if many small strata accumulated. Conversely, if several small strata occur on a short time  
664 interval, it may look as if a single large stratum evolved (see Fig S3 for the heterogeneity of



665 simulation replicates). Several but not all strata result from inversions. Our model is presented  
666 using the term “inversion”, but as explained in sup. mat. 2 there is nothing inversion-specific in  
667 our model, and other genetic modification suppressing recombination would work.

668 Empirically, the relative timing of degeneration and dosage compensation is not easily  
669 established. Dosage insensitive genes will almost never evolve dosage compensation, by  
670 definition, unless they are caught in a chromosomal level mechanism. Hence seeing that some  
671 genes are degenerated but not dosage compensated is not very informative. It may simply indicate  
672 that they are dosage insensitive, not that dosage compensation evolves after degeneration for  
673 dosage sensitive genes. Hence, observing that degeneration is more advanced than dosage  
674 compensation is not refuting our theory. Similarly, our model does not require complete early and  
675 full dosage compensation of all genes in a stratum. Only dosage sensitive genes are expected to  
676 evolve quick and early compensation, so observing partial or gene specific compensation is not  
677 refuting what we propose. The evolution of dosage compensation in neo-Y systems, after the  
678 fusion of an autosome to an already existing Y might be special cases, where a chromosomal-level  
679 dosage compensation mechanisms is just extended, without having to evolve from scratch. Such  
680 chromosomal-level mechanism would involve all genes (dosage sensitive or not) and therefore  
681 lead to a quite specific patterns. Other observations consistent with our theory include the absence  
682 of degenerated sex chromosomes in species where sex chromosomes are expressed in haploids, as  
683 in *Ectocarpus* algae (49). The presence of evolutionary strata on young mating-type chromosomes  
684 in species entirely lacking sexual dimorphism (50). could be explained by regulatory evolution if  
685 mating-type specific expression could evolve. However, recombination may evolve for other  
686 reasons in species with specific reproductive modes (51).

687 Our model predicts that Y recombination arrest and degeneration should be quicker in large  
688 populations, everything else being constant. This pattern may not hold, or may be saturating for  
689 larger population sizes than the ones we considered. This is open for investigation, but would  
690 require very long computation time. Empirically, we do not have clear indication of the effect of  
691 population sizes on the patterns of sex-chromosome evolution. There are many confounding  
692 factors (shared ancestral sex determination systems across species, different ages of sex  
693 chromosomes, the initial recombination rate around the sex-determining locus, and the particular  
694 case of achiasmate species), but this is an interesting avenue for future research.

695

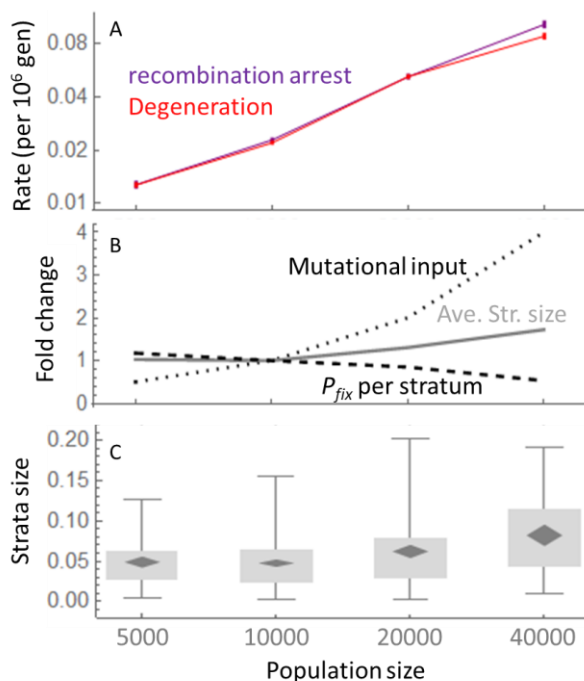

696

697 **Fig S1.** Effect of population size on Y recombination arrest and degeneration. **(A)** Rate of  
698 recombination arrest (fraction of Y becoming non-recombining, purple) or degeneration  
699 (proportion of gene knocked-out, red) per million generations, for different population sizes ( $x$ -  
700 axes). These processes are approximately linear in time (not shown). **(B)** Contribution of the  
701 different factors to the variation in the rate of recombination arrest. The absolute number of  
702 inversions arising is proportional to population size (dotted curve, scaled relative to the value at  $N$   
703 = 10,000). Stabilized inversions tend to be larger in larger populations (gray line, scaled relative  
704 to the value at  $N = 10,000$ ). The probability that an inversion fixes and becomes stabilized  
705 decreases with population size (dashed line, scaled relative to the value at  $N = 10,000$ ). The  
706 contribution of these three factors explain the difference in rates shown on panel A. **(C)**  
707 Distribution of stabilized inversions sizes for different population sizes. Black diamonds show  
708 means and confidence intervals; gray boxes show limits of 25% and 75% quantiles; whiskers show  
709 5% and 95% quantiles.

710

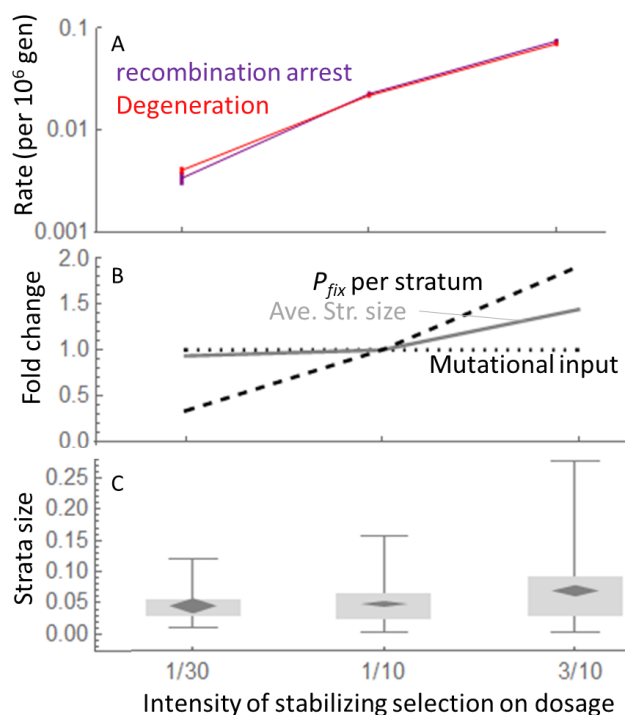

711  
712  
713  
714  
715  
716  
717  
718  
719  
720  
721  
722  
723  
724  
725  
726  
727  
728

**Fig S2.** Effect of the intensity of stabilizing selection on gene expression levels, on Y recombination arrest and degeneration. **(A)** Rate of recombination arrest (fraction of Y becoming non-recombining, purple) or degeneration (proportion of gene knocked-out, red) per million generations, for different intensities of stabilizing selection ( $I$ ) on dosage ( $x$ -axes). These processes are approximately linear in time (not shown). **(B)** Contribution of the different factors to the variation in the rate of recombination arrest. The absolute number of inversions arising is identical for the different values of  $I$  and correspond to the value at  $N = 10,000$  (dotted line). The probability that an inversion fixes and becomes stabilized increases with  $I$  (dashed line, scaled to the value at  $I = 0.1$ ). Stronger stabilizing selection increases the sex-antagonistic fitness effect of nascent dosage compensation, which increase the chance that an inversion is stabilized and that large inversions escape reversion. The contribution of these three factors explain the difference in rates shown on panel A. **(C)** Distribution of stabilized inversions sizes for different values of  $I$ . Black diamonds show means and confidence intervals; gray boxes show limits of 25% and 75% quantiles; whiskers show 5% and 95% quantiles.

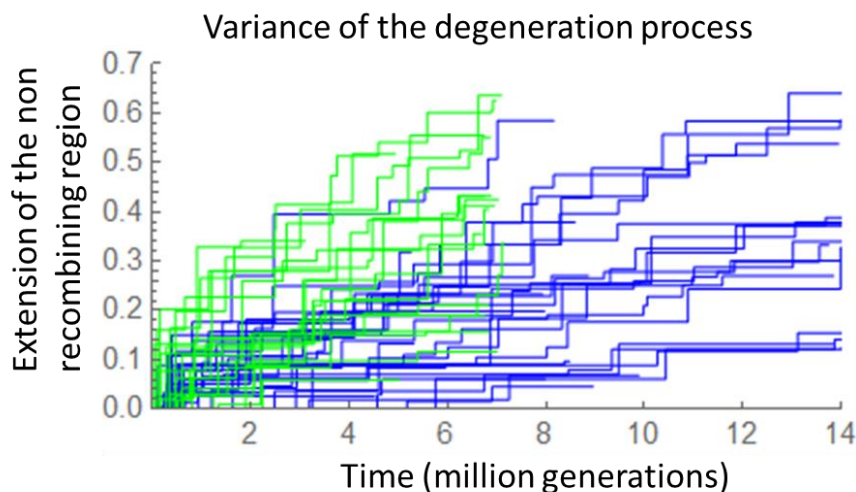

729  
730 **Fig S3.** Stairplot representing the occurrence of stabilized strata on Y in different evolutionary  
731 replicates. Each line corresponds to the stairplot illustrated in black in Fig. 2A for one replicate.  
732 Parameters as in Fig. 2, except for population size: blue  $N_{pop}=10,000$ , green  $N_{pop}=20,000$ . Note  
733 that runs with  $N_{pop} = 10,000$  and  $20,000$  were stopped at 7 million generations and 14 million,  
734 respectively. In both cases, some runs were slower and were interrupted before reaching this limit,  
735 because of computation time limits. The figure shows that the process of recombination arrest is  
736 highly stochastic.  
737

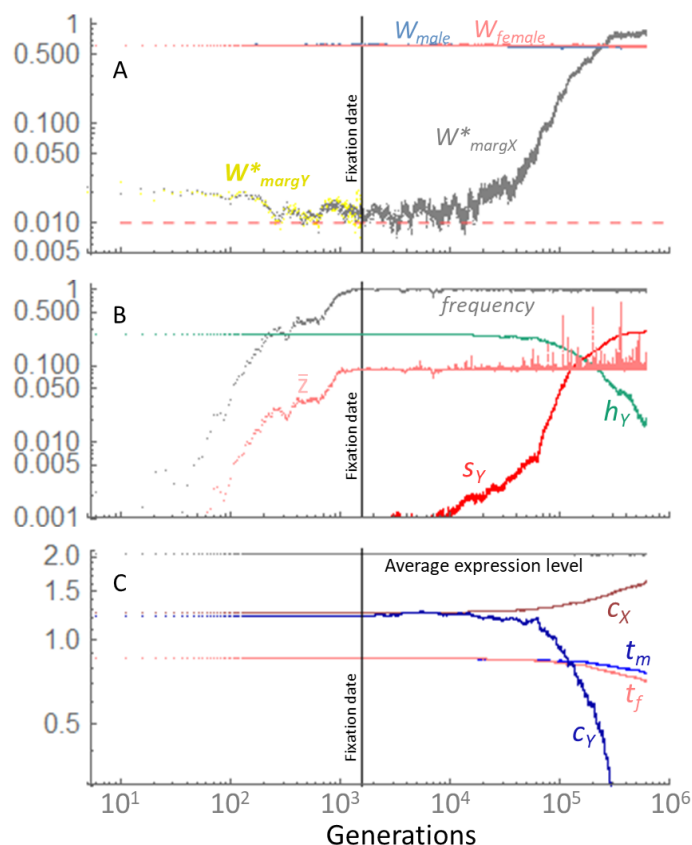

738  
 739 **Fig S4.** Details of the fixation and stabilization of a first stratum. **(A)** x-axis, inversion age: the  
 740 number of generations since the appearance of the inversion (in log-scale). Gray : marginal fitness  
 741 of the inversion relative to the same chromosomal segment on the X if it was in a male ( $W_{margX}$ ,  
 742 see methods). After fixation,  $W_{margX}$  measures the sex-antagonistic effect of nascent dosage  
 743 compensation. Yellow: marginal fitness of the inversion relative to the same chromosomal  
 744 segment among Y-chromosomes not carrying the inversion ( $W_{margY}$ , see methods). Note that  $W_{margY}$   
 745 cannot be computed after the inversion fixes as all Y-chromosomes carry the inversion. Both these  
 746 fitness values are represented minus 0.99 (and noted with a \*) to allow for a better visualization  
 747 on the y-axis log-scale. Consequently, the red dashed line at 0.01 represents a marginal relative  
 748 fitness of 1. Average fitness of males and females in the population are also indicated in blue and  
 749 pink. **(B)** Gray: Frequency of the inversion. Pink average fraction of the non-recombining Y in the  
 750 population ( $\bar{z}$ ). Green: average dominance of deleterious mutations on the inversion ( $h_Y$ ). Red:  
 751 average deleterious effect of mutations among genes on the inversion ( $s_Y$ ). **(C)** Regulatory trait  
 752 variation. Dark blue: average *cis*-regulatory trait on the inversion. Brown: average *cis*-regulatory  
 753 trait on the corresponding X segment. Blue: average *trans*-regulatory trait associated to genes on  
 754 the inversion. Pink: average *trans*-regulatory trait associated to genes on the corresponding X  
 755 segment. Gray: average total gene expression per genes (undistinguishable in males or females)  
 756 for genes present on the inversion. Note that between  $10^3$  and  $\sim 5 \cdot 10^4$  generations, there is enough  
 757 sex-antagonistic effect of nascent dosage compensation to protect the inversion from reversion, as  
 758 seen on panel A with  $W_{margX}$ , while there is still almost undetectable X-Y *cis*-divergence and male  
 759 –female *trans*-regulatory divergence. On all panels, the vertical bar indicates the date at which the  
 760 inversion fixes for the first time (because of the occurrence of reversions the frequency slightly  
 761 departs from one afterwards).



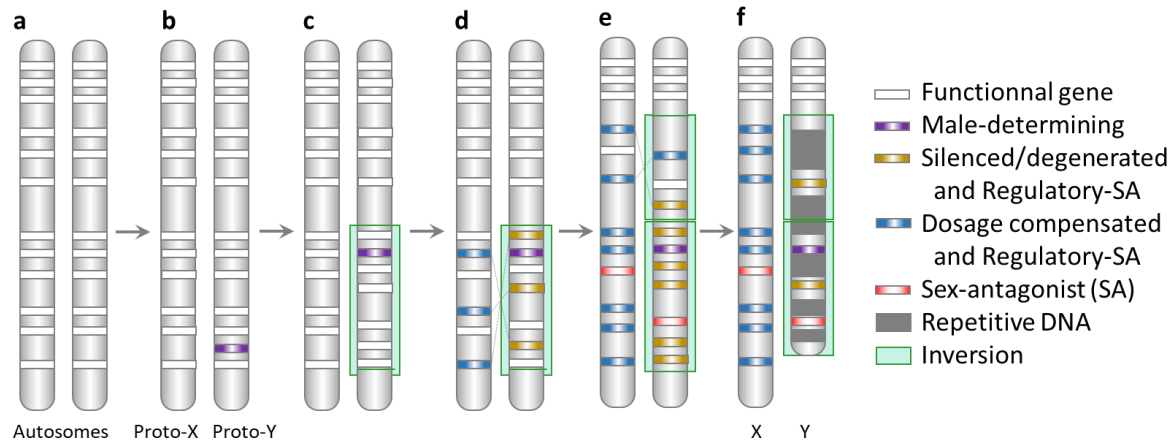

762  
763

764 **Fig S5.** Overview of Y evolution proposed here, inspired from Fig. 1 in (25) representing current  
 765 theory. (a) and (b) A pair of autosomes acquire a sex-determining locus (purple). (c) A lucky  
 766 inversion carrying fewer or milder deleterious mutations than average selectively fixes in the  
 767 population (green). (d) Cis- and trans-regulatory divergence causes regulatory sex-antagonistic  
 768 effects on dosage sensitive genes, which stabilizes the inversion on the long term. Y genes tend to  
 769 be silenced (yellow) and accumulate deleterious mutation (degeneration by regulatory evolution),  
 770 while their X copy already show dosage compensation (blue). (e) The process repeats itself with  
 771 another sex-linked inversion, creating another stratum. Some sex-antagonistic alleles can occur  
 772 and be maintained on these sex-linked regions, but they were not involved in recombination arrest  
 773 (red). (f) The absence of recombination leads to the accumulation of repetitive DNA and/or  
 774 structural changes (deletions).  
 775

776

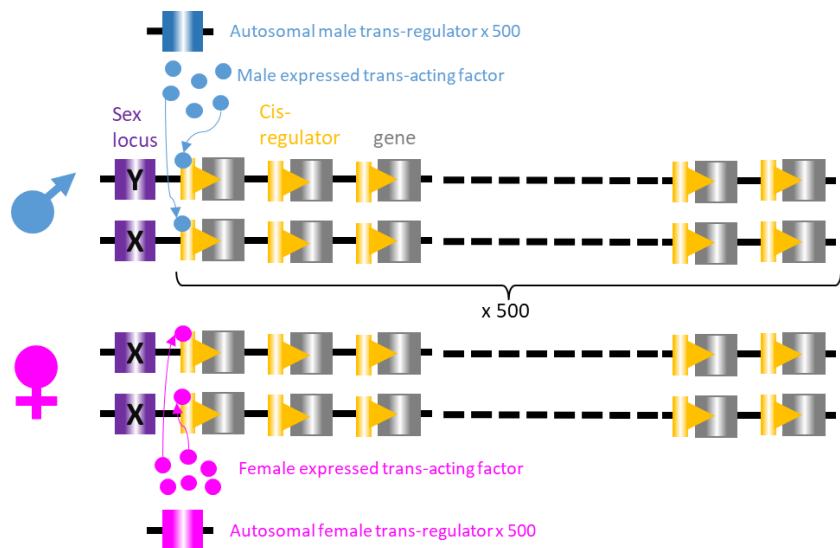

777

778

779

780

781

782

783

784

785

786

787

**Fig S6.** Overview of the genome simulated. The sex chromosome pair carries the sex locus at one end with two alleles (X/Y) determining sexes (XX female, XY male). This chromosome carries 500 coding genes, each with a *cis*-regulator. Each *cis*-regulator interact with a *trans*-acting factor expressed from an autosomal *trans*-regulator which differs in males and females. Genes, *cis*- and *trans*-regulators all mutate (partially deleterious mutations on genes, Gaussian deviations on *cis* and *trans* regulatory traits). Gene expression level is under stabilizing selection, and dominance of deleterious alleles in coding sequences depend on their relative allele-specific expression. See Fig 1 in (35) for visual sketch of expression patterns and selection on each gene.
